# Supplementary material for: Tetrodotoxin Profiles in Xanthid Crab Atergatis floridus and Blue-Lined Octopus Hapalochlaena cf. fasciata from the Same Site in Nagasaki, Japan
Source: MDPI journal article supplement (doi:10.3390/toxins15030193), 2023-03-03
Supplement: s1 [file s1]

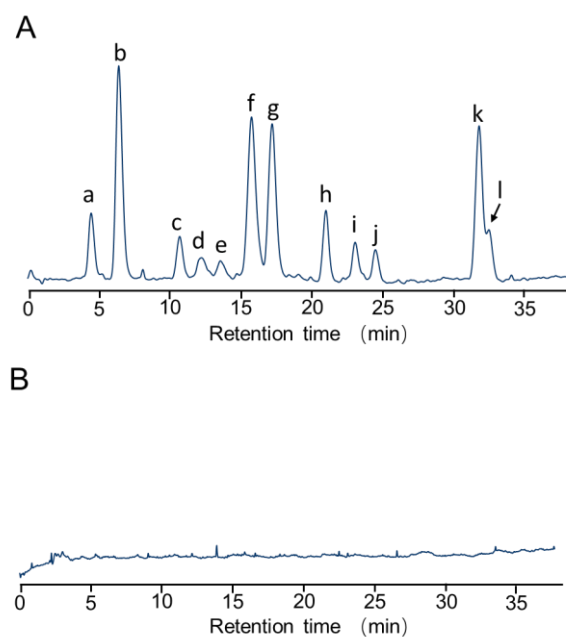

**Figure S1.** HPLC-FLD chromatograms of **A:** PSTs standard and **B:** *A. floridus* extracts in 2020.

a: dcneoSTX; b: dcSTX; c: dcGTX3; d: hyneoSTX; e: hySTX; f: neoSTX; g: STX; h: dcGTX2; i: GTX3; j: GTX4; k: GTX1; l: GTX2.
